# Supplementary material
Source: publisher figshare collection journal article supplement (https://sage.figshare.com/ndownloader/files/18169049)
Supplement: Supplementary file 1 [file 18169049]

**O fracasso do ensaio desenvolvimentista de Dilma Rousseff[[1]](#footnote-2)**

**André Singer**

Por que fracassou a tentativa encetada por Dilma em seu primeiro mandato (2011-2014) de garantir crescimento sustentável com reindustrialização? Hipótese: a presidente apostou em uma coalizão entre industriais e trabalhadores para sustentar uma virada desenvolvimentista que aceleraria o passo do lulismo. No meio do caminho, a coalizão se desfez, pois os industriais mudaram de posição, deixando afundar a arquitetura que deveria levar o país para fora da arrebentação gerada em 2011 pela recidiva da crise mundial. No lugar da coligação entre capital industrial e trabalho surgiu uma renovada frente única burguesa em torno de plataforma neoliberal, em particular o corte de gastos públicos e as reformas trabalhista e previdenciária. O que desejo investigar neste artigo são os componentes políticos do fracasso desse ensaio desenvolvimentista, ligados ao problema das coalizões de classe que dão suporte a esta ou aquela orientação econômica. Não entro na controvérsia propriamente econômica.

Para uma definição mínima de desenvolvimentismo, vejam‑se os itens elencados pelo economista Ricardo Bielschowsky: “Entendemos por desenvolvimentismo […] a ideologia de transformação da sociedade brasileira definida pelo projeto econômico que se compõe dos seguintes pontos fundamentais: a) a industrialização integral é a via de superação da pobreza e do subdesenvolvimento brasileiro; b) não há meios de alcançar uma industrialização eficiente e racional no Brasil através das forças espontâneas do mercado; por isso, é necessário que o Estado a planeje; c) o planejamento deve definir a expansão desejada dos setores econômicos e os instrumentos de promoção dessa expansão; e d) o Estado deve ordenar também a execução da expansão, captando e orientando recursos financeiros, e promovendo investimentos diretos naqueles setores em que a iniciativa privada seja insuficiente” (Bielschowsky, 1995, p. 7).

Quando se observa o conjunto das ações contidas na “nova matriz econômica” de Dilma Rousseff, percebe‑se o seu viés desenvolvimentista, aceitos os parâmetros de Bielschowsky. A desobstrução de caminhos para a retomada industrial, os esforços pela industrialização integral, a crença no papel indispensável do planejamento estatal, a desconfiança das forças espontâneas de mercado, a decisão por parte do Estado dos setores que devem se expandir e o papel público em seu financiamento — todos os fatores estiveram presentes durante o primeiro mandato de Dilma.

**Avanço, auge e recuo**

Após um primeiro semestre até certo ponto típico no início de cada mandato presidencial – restrição orçamentária[[2]](#footnote-3), ajustes ministeriais etc --, no inverno brasileiro de 2011 a segunda fase da crise financeira planetária interrompeu a rotina de Dilma Rousseff. Entre 4 e 5 de agosto, mercados ao redor do globo reviveram a turbulência de 2008. A exemplo do que havia sido feito em 2008, a presidente procurou sustentar o ritmo de crescimento local, apesar da retração generalizada. Cálculos mostravam que, para continuar as reformas do lulismo, era preciso que o PIB crescesse cerca de 5% ao ano (Singer, 2012, p. 160). Foi aí que se abriu a oportunidade para a nova matriz, que vinha sendo preparada desde a substituição de Henrique Meirelles por Alexandre Tombini à frente do Banco Central (BC) em novembro de 2010.[[3]](#footnote-4) Na conduta anticíclica então adotada por Dilma, destacaram-se a redução dos juros, uso intensivo do BNDES, aposta na reindustrialização, desonerações, plano para infraestrutura, reforma do setor elétrico, desvalorização do real, controle de capitais e proteção ao produto nacional.[[4]](#footnote-5)

O lulismo fora a estratégia inventada por Lula, a partir de 2003, de, sem romper com a ortodoxia econômica (sobretudo no seu primeiro mandato, entre 2003 e 2006), construir uma política de promoção do mercado interno voltado aos menos favorecidos, a qual, somada à manutenção da estabilidade, *correspondia nada mais nada menos que à realização de um completo programa de classe* (ou fração de classe, para ser exato).[[5]](#footnote-6) Não o da classe trabalhadora organizada, cujo movimento iniciado no final da década de 1970 tinha por bandeira a “ruptura com o atual modelo econômico” (Diretório Nacional do PT, 2002, p. 15), mas à fração de classe que Paul Singer chamou de “subproletariado” ao analisar a estrutura social do Brasil no início dos anos 1980. Subproletários são aqueles que “oferecem a sua força de trabalho no mercado sem encontrar quem esteja disposto a adquiri-la por um preço que assegure sua reprodução em condições normais” (Singer, 1981, p. 22). Estariam nessa categoria “empregados domésticos, assalariados de pequenos produtores diretos e trabalhadores destituídos das condições mínimas de participação na luta de classes” (Singer, 1981, p. 83).

Coube a Rousseff, quadro com passagem pelo desenvolvimentismo brizolista, afastar-se da ortodoxia econômica, adotando a intervenção *sistemática* do Estado na economia pela primeira vez em quase quarenta anos. O ex-ministro Luiz Carlos Bresser-Pereira, sensível à questão nacional, notou logo o que estava em jogo. A presidente “certamente pensa em liderar um projeto nacional com amplo apoio da sociedade” e tem disposição para enfrentar os nós górdios da situação, a saber, “a armadilha da alta taxa de juros e do câmbio sobreapreciado”, escreveu ele no calor da hora (Bresser-Pereira, 2013, p. 10).

Diante do domínio das teses neoliberais a partir dos anos 1980, com a interdição que se impôs à intervenção estatal, o programa efetivado por Dilma foi audaz, não obstante os reparos que possam ser feitos a ele. Por exemplo, na visão de Bresser-Pereira, expoente do “novo desenvolvimentismo”, o real teria que ser *mais* desvalorizado, de modo a tornar a indústria brasileira efetivamente competitiva. Bresser falava, na época, em puxar o dólar para R$ 2,75, quando só chegou a R$ 2,0 na mididesvalorização promovida pela nova matriz (Bresser-Pereira, 2013).[[6]](#footnote-7) Segundo o economista Ricardo Carneiro, contudo, “uma desvalorização real efetiva da ordem de 20% não é pouco significativa” (Carneiro, 2018, p.18). O economista Pedro Paulo Bastos, por sua vez, afinado com o “social-desenvolvimentismo”, criticou a falta de investimento público no ensaio dilmista. “Política anticíclica boa seria parecida com a de 2009: imagina se o governo perseguisse superávit primário elevado ou meramente aumentasse subsídios em 2009! A política anticíclica ali contou com forte aceleração do gasto público e particularmente do investimento, o que incentiva diretamente a demanda efetiva” (Guimarães, 2015). Carneiro nota, entretanto, que “o conjunto do investimento público amplia-se ligeiramente” entre o segundo mandato de Lula e o primeiro de Dilma, indo “de 4,1% do PIB para 4,3% dividido proporcionalmente entre estatais e administração pública” (Carneiro, 2018, p. 30). Isto é, talvez o investimento público não tenha sido o suficiente para reorientar a produção num período adverso, mas não teria ocorrido uma inversão da política anterior.

Mesmo que eventualmente justas, as críticas não desmentem que, no contexto do reformismo fraco lulista, a nova matriz implicava comprar brigas inéditas, uma vez que confrontava o poder político do setor financeiro.[[7]](#footnote-8) É como se, aproveitando-se do acúmulo anterior obtido, Dilma procurasse acelerar o passo do lulismo. Convém lembrar que, já com a ascensão de Guido Mantega ao Ministério da Fazenda, em 2006, começara a construção de condições para maior ativismo estatal.[[8]](#footnote-9) Em 2007, por meio do Plano de Aceleração do Crescimento (PAC), o Estado começa a despertar da letargia que remontava aos anos 1980. Depois, em 2008, os bancos públicos adquiriram rol crucial na reorganização produtiva, representando poderosas alavancas de indução da iniciativa privada. Em 2009 e 2010, a incorporação de incentivos fiscais seletivos ao arsenal de instrumentos disponíveis dá ao Estado acesso a alavancas antes bloqueadas. Por fim, a nomeação de Tombini, às vésperas de 2011, incorporava o BC aos preparativos para o salto de qualidade.

Se desse ângulo há continuidade entre Lula e Dilma, do ponto de vista político ocorre uma inflexão. Lula sempre operou nas margens, evitando o confronto. Dilma, ao contrário, entra em combate. Ao reduzir os juros e forçar os spreads para baixo rompe a “detente” com o rentismo. Naquele instante (2012), a ruptura foi apoiada pelos industriais. “Finalmente”, escreveu o empresário da siderurgia e vice-presidente da Fiesp Benjamin Steinbruch, o Brasil entrava “na era dos juros civilizados” (Steinbruch, 2012).

Além de enfrentar o núcleo do capital (setor financeiro), Dilma decidiu politizar o tema, o que estava igualmente fora do script lulista. No lançamento do segundo pacote de proteção à indústria nacional, em 2012, Dilma afirmou ser difícil justificar tecnicamente o nível dos spreads praticados no país pelos bancos privados. Mais adiante declara possuir os “instrumentos” para que as empresas tivessem “acesso a um custo de capital menor” (Mendes, 2012) e ato contínuo, por meio do ministro Guido Mantega, aciona o Banco do Brasil (BB), que é público, para que reduza os próprios spreads. Ameaçados de perder faixas do mercado, os bancos privados são obrigados a recuar. Compreende-se que, daí em diante, derrubar Mantega tenha se convertido em meta permanente no meio financeiro. “O diagnóstico dos bancos é que, se não fizerem nada para reduzir as taxas, vão perder clientes para instituições públicas, sobretudo no atendimento a empresas”, relatava a *Folha de S. Paulo*(D’Amorim e Sjarreta, 2012)*.* Foi nesse clima triunfante que Dilma fez a seguinte alocução no Primeiro de Maio de 2012: “O setor financeiro (...) não tem como explicar esta lógica perversa aos brasileiros: a Selic baixa, a inflação permanece estável, mas os juros do cheque especial, das prestações ou do cartão de crédito não diminuem”.

Em outubro de 2012, com apenas 4,6% de desemprego e a renda dos trabalhadores em alta, o PT ganhou a eleição na cidade de São Paulo. Fernando Haddad – jovem político cujo perfil técnico lembrava o da própria Dilma – vencera o veterano José Serra, do PSDB. O desempenho petista nos pleitos municipais fazia crer que a travessia dirigida por Dilma ia de vento em popa. O Planalto preparou-se, então, para encerrar 2012 com chave de ouro, reduzindo o preço da eletricidade, o que atendia campanha lançada pela Federação das Indústrias do Estado de São Paulo (Fiesp) em 2011 – e simultaneamente fazia gesto à população pobre, para a qual o peso da conta de energia é relevante. Parecia o fecho adequado para a vitória da coalizão industrial-popular. O ensaio desenvolvimentista chegava ao seu auge.

O clímax prenunciava, contudo, um ocaso doloroso. Ao colocar na coroa a joia do setor elétrico reformado, rompia-se a base fundamental do experimento. Aproveitando-se de subida ocasional de preços em janeiro, o presidente do BC, em conversa com a jornalista Miriam Leitão em 7 de fevereiro, deixa escapar que a inflação estava “mostrando uma resiliência forte” e que a situação não era “confortável” (Leitão, 2013). Foi o suficiente para que os investidores passassem a apostar na alta dos juros, o que significava demolir a viga mestra da construção desenvolvimentista. Usar a política monetária para segurar a inflação – senha da direção neoliberal --, justo quando a redução de custos ao tomador finalmente se completava, significava desmontar o ensaio desenvolvimentista.

Até o BC começar a subir os juros, os desenvolvimentistas alimentavam as esperanças de retomar o ritmo de elevação do PIB. O crescimento de apenas 0,9% em 2012 (de acordo com a metodologia antiga; 1,8% pela metodologia nova), bem como o fato de os investimentos não aumentarem, apesar de todas as medidas tomadas, agoniava os dirigentes da nova matriz. Mas até a alta dos juros (abril de 2013) havia esperança de que as medidas anticíclicas tomadas a partir de meados de 2011 dessem resultado. Em alguma medida, a previsão deu certo, pois houve crescimento de 2,3% do PIB em 2013 (pela metodologia antiga; 2,7% pela nova). Se esse índice de crescimento ainda não era o necessário, ajudava a manter o nível de emprego e os ganhos salariais dos trabalhadores. Entretanto, com o contínuo aumento dos juros, cujos efeitos contracionistas costumam ocorrer apenas entre seis meses e um ano depois de realizados, as perspectivas de manter crescimento em 2014 estavam anuladas. De fato, em 2014 o Brasil cresceu apenas 0,5% (metodologia nova).

Simultaneamente, o aumento das críticas ao ativismo estatal por parte de bancos estrangeiros, de agências de risco, de instituições internacionais de controle econômico, de corporações multinacionais e de múltiplas vozes nos meios de comunicação de massa brasileiros criavam o clima ideológico necessário para forçar uma virada neoliberal. Incontáveis artigos e editoriais, milhares de reportagens em veículos nacionais e estrangeiros, milhões de minutos de rádio e TV foram dedicados a mostrar o quanto era preciso cortar os gastos ineficientes e “descontrolados” do governo e deixar o mercado funcionar para “reordenar o país” e voltar a crescer. A mais eficiente pressão em favor do choque neoliberal veio, contudo, de onde menos se esperava, e por isso, foi decisiva. *O empresariado industrial, à medida que a política a seu favor ia sendo aplicada, mostrava-se paradoxalmente refratário ao governo*. Como explicar o enigma?

**Movimento pendular**

Para dar conta das articulações de classe que caracterizariam o lulismo, formulei um esquema interpretativo segundo o qual, ao longo dos mandatos de Lula teriam atuado duas coalizões contrapostas, a “rentista” e a “produtivista”. A rentista unificaria o capital financeiro e a classe média tradicional, enquanto a produtivista estaria composta dos empresários industriais associados à fração organizada da classe trabalhadora. Pairando sobre ambas, com suporte no subproletariado, os governos lulistas arbitrariam os conflitos de acordo com a correlação de forças, ora dando ganho de causa a uma ora à concorrente (Singer, 2012, pp. 155-68 e pp. 200-21).[[9]](#footnote-10)

O programa rentista seria manter o Brasil alinhado ao receituário neoliberal, bem como na órbita do grande capital internacional e da liderança geopolítica norte-americana. Para a coalizão produtivista, a meta primordial seria acelerar o ritmo de crescimento por meio de intervenção do Estado que levasse à reindustrialização, permitindo tornar mais veloz a distribuição de renda. Supunha-se que a união rentista encontrava canal privilegiado no Partido da Social-Democracia Brasileira (PSDB), pela simpatia que o partido aufere no setor financeiro e na classe média tradicional. No campo produtivista, o Partido dos Trabalhadores (PT) permaneceu próximo ao movimento sindical e, na sua versão lulista, do subproletariado, tendo se tornado, também, amigável ao setor industrial a partir de 2002, como testemunha a presença do empresário têxtil José Alencar na chapa de Lula em 2002 e 2006. O Partido do Movimento Democrático Brasileiro (PMDB, atual MDB), por sua vez, conseguiu fincar raízes no agronegócio, setor que, da mesma maneira que o pemedebismo, oscilaria entre as duas coalizões principais.

No primeiro semestre de 2011 o pacto entre industriais e trabalhadores teria se intensificado com o documento comum assinado pela Fiesp, a Central Única dos Trabalhadores (CUT), a Força Sindical, o Sindicato dos Metalúrgicos do ABC e o Sindicato dos Metalúrgicos de São Paulo. O *Brasil do diálogo, da produção e do emprego*, lançado em maio daquele ano,registrava que a “crescente reprimarização da pauta de exportação”, a “substituição da produção doméstica por produtos e insumos industriais importados” e a “expressiva queda do conteúdo nacional na produção” fez acender “uma luz amarela” e empurrou os parceiros para a ação conjunta (Skaf, Henrique e Silva, 2011).

O mistério está em que, apesar das evidentes convergências, os industriais, em lugar de consolidarem o suporte ao governo, foram progressivamente se afastando de Dilma, alinhando-se lenta e continuamente ao bloco rentista. Como se cada gesto do governo para efetivar o programa por eles proposto, fizesse crescer o temor do “intervencionismo”, inviabilizando investimentos e criando desconfiança. No princípio, os reclamos empresariais eram a boca pequena, mas logo se rasgaria publicamente a costura de 2011.

Em abril de 2013, a Fiesp divulga estudo, mostrando vantagens de as indústrias brasileiras se instalarem no Paraguai. “Nós vemos um potencial enorme de integração de cadeias produtivas com o Paraguai, *com disponibilidade de mão de obra significativa para indústria de manufatura tradicional*, *que vem sofrendo e perdendo competitividade com relação ao exterior*”, afirmou diretor da entidade no seminário Oportunidades de Investimentos no Paraguai*.* Entre as vantagens, estaria a *mão de obra 36% mais barata no país vizinho por não haver encargos trabalhistas* (Fiesp, 2013, grifos nossos)*.* Em tom duro, um dos signatários do pacto de dois anos antes pela CUT contestou: “Talvez esse seja o grande sonho da Fiesp: uma região onde a carga tributária seja a menor possível, aquela capaz de atender minimamente, de maneira paternalista, apenas aos que estão em situação de extrema pobreza e condenar vários países da região, começando pelo Paraguai, a ser verdadeiras maquiladoras para ampliar lucros das grandes empresas” (Henrique, 2013)*.*

Quando em junho de 2013, a Fiesp iluminou a fachada do seu imponente edifício na Avenida Paulista com a bandeira nacional, em sinal de simpatia aos símbolos adotados pelo centro e direita que se manifestavam na rua, ficava claro que a entidade tinha passado para a oposição. O presidente da entidade, Paulo Skaf, que esteve em um dos atos daquele mês, escreveu que tinha assistido a um “grito por renovação” (Skaf, 2013). As manifestações de junho, embora tenham sido bem mais que isso, converteram-se no *start* da onda de classe média contra Dilma, que iria ter seu auge em março de 2016, quando se deu o empurrão definitivo para derrubar a ex-presidente.[[10]](#footnote-11) Em resposta à ofensiva patronal, as centrais sindicais tentaram, desde então, e com menos sucesso, colocar na praça as pautas especificamente trabalhistas (CUT nacional, 2013). A coalizão produtivista estava desfeita e a luta de classes retomava a centralidade.

Paralelamente, percebe-se a formação de uma *frente única burguesa* opositora ao ensaio desenvolvimentista. No segundo semestre de 2013, a colunista Claudia Safatle expôs a situação na primeira página do jornal *Valor.* O Planalto concluíra que as políticas solicitadas pelos industriais, como a redução dos juros e a desoneração da folha de pagamentos, não teriam produzido o efeito esperado, gerando, ao contrário, *desconfiança* no meio empresarial. Premido pela situação, o Executivo passou a fazer concessões, como maior retorno às empresas concessionárias de obras públicas (Safatle, 2013). Mas não adiantou: a oposição se tornava cada vez mais contundente. No final de 2013, no encontro nacional da indústria promovido pela Confederação Nacional da Indústria (CNI), logo depois de a presidente se retirar do recinto, um associado tomou a palavra para atacar: “Temos andado de lado em matéria de crescimento e produtividade”. Em agosto de 2014, Steinbruch, agora presidente interino da Fiesp, o mesmo que dois anos antes saudara a entrada do Brasil na era dos juros civilizados, afirmava que “só um louco investe no Brasil”. Ele havia migrado, também, para a defesa da flexibilização da CLT, como fizera a CNI dois anos antes.

Com a adesão dos industriais, do agronegócio, do comércio e dos serviços às propostas do setor financeiro, a unidade capitalista em torno do corte de gastos públicos, queda no valor do trabalho e diminuição da proteção aos trabalhadores, tornou-se completa. Como reflexo, em novembro de 2014, o presidente da CNI, Robson Andrade, fez a defesa do ajuste fiscal, e até mesmo do aumento da taxa de juros (Branco, 2014), o que, em tese, viria em prejuízo dos interesses do setor produtivo. Enquanto Dilma realizava, por cima, o avanço desenvolvimentista, a burguesia industrial lhe tirava o chão por baixo.

**Zigue-zague atordoante**

O zigue-zague dos empresários parece ter apanhado a presidente de surpresa. “*Eu (...) nunca percebi a história, a não ser*a posteriori*, das classes mais enriquecidas do Brasil em relação aos juros. Eu não percebi, também, qual era o nível de aversão deles a pagar qualquer parte da crise”* (Piccin e Pomar, 2017)*.* Despreparada para o baque, Dilma ficou sem reação. Para reagir à esquerda, precisaria mobilizar a classe trabalhadora organizada e o movimento popular. Mas como isso não constava do roteiro lulista, sozinha, Dilma foi recuando ponto a ponto, tentando em cada um deles reconquistar o apoio empresarial perdido. Nos protestos de junho de 2013, Dilma promoveu um corte R$ 10 bilhões no Orçamento de 2013, “em resposta, sobretudo, ao mercado financeiro, que o acusa [ao governo] de leniência com a inflação” (Barrocal, 2013).

Coerente com essa busca de recompor a coalizão produtivista, no começo de 2014 Dilma limitou outra vez o gasto público, abandonando o projeto de lei que reduzia as dívidas de Estados e municípios. Em consequência, a Prefeitura estratégica comandada por Haddad viu-se estrangulada, pondo em perigo o futuro do PT na gestão paulistana, a qual efetivamente seria perdida na eleição de 2016. Some-se, à contenção dos gastos públicos, os juros sempre em elevação e será compreensível que o crescimento do PIB em 2014 tenha sido praticamente zero (UOL, 2015). A política monetária e fiscal contracionista, junto com a profunda desconfiança da burguesia, contribuiu para afundar o investimento, o qual apresentou queda de 4,4% justamente no ano eleitoral. O declínio da atividade econômica, por sua vez, puxou para baixo a arrecadação, deixando o Estado vulnerável às novas propostas de ajuste fiscal que se tornaram, a partir daí, avassaladoras. A agenda neoliberal, como um todo, ganhava impulso.

Por fim, consciente de que o cerco se fechava, a presidente aderiu ao zigue-zague predominante: piscou à esquerda e virou à direita. Decidiu manter as políticas de estímulo, como a desoneração da folha de pessoal, o IPI reduzido para os bens duráveis, o Programa de Sustentação dos Investimentos (PSI) e o aporte para o Minha Casa Minha Vida, de modo a garantir estabilidade do emprego e elevação da massa salarial durante a campanha de 2014. Isso lhe permitiu convencer setores progressistas e o eleitorado popular de que ela tinha disposição de evitar o choque neoliberal encampado pelo PSDB. “Eles (...) querem trazer de volta a recessão, o desemprego, o arrocho salarial, o aumento da desigualdade e toda a submissão que o Brasil tinha no passado ao Fundo Monetário Mundial”, disse Dilma na campanha referindo-se ao PSDB (Souza, 2014). Mas reeleita, a presidente deu um cavalo de pau, nomeou um ministro da Fazenda neoliberal e abriu o caminho do impeachment.

**Explicações**

O tema das frações burguesas continua atual. Em nota recente, o cientista político Sebastião Velasco e Cruz assinala que em diferentes países se discute a possível “emergência de uma classe capitalista transnacional” (Velasco e Cruz, 2017, p. 4). No Brasil, o cientista político Armando Boito tem defendido a permanência, apesar das transformações recentes, da importância das burguesias locais. Para ele, acima do aspecto produtivo ou rentista da atividade econômica, o elemento chave para compreender a posição de cada segmento burguês estaria no seu caráter nacional ou internacional. Empresas controladas pela “grande burguesia interna”, que “teme ser engolida ou destruída pelos grandes grupos econômicos estrangeiros”, precisariam contar com “a ação protetora e ativa do Estado brasileiro” (Boito, 2012A). Boito sublinha que o anseio de proteção por parte do Estado separaria bancos nacionais em relação a estrangeiros e indústria nacional da internacional. Toda a “burguesia interna”, aquela que, segundo Poulantzas, “possui um fundamento econômico e uma base de acumulação próprios” (Poulantzas, 1975, p. 77), desejaria ser defendida da concorrência externa, que ameaçaria sufocá-la, enquanto os capitalistas externos combateriam o protecionismo, privilegiando a abertura dos mercados.

A burguesia interna brasileira, seja ela rentista ou produtiva, teria consistente lista de interesses comuns: protecionismo alfandegário para os produtos nacionais; limitação da entrada de capital estrangeiro no setor bancário; estímulo à produção nacional de etanol; preferência pelos estaleiros nacionais nas compras estatais; ação política do Estado no exterior para auxiliar as empresas brasileiras de exportação e construção pesada fora do país (Boito, 2012A, p. 77); financiamento das empresas nacionais pelo BNDES; apoio à exportação de mercadorias e capitais das empresas brasileiras; manutenção da demanda interna e investimento estatal em infraestrutura (Boito, 2012B).

A visão de Boito se estende para as coalizões. Em lugar da pugna entre produtivistas e rentistas, proposta por mim, haveria a luta da burguesia interna, aliada ao movimento sindical e popular, contra a burguesia “perfeitamente integrada e subordinada ao capital estrangeiro”, aliada ao capital financeiro internacional (Boito, 2012B, pp.69-70). De acordo com esse ponto de vista, a burguesia interna teria se tornado hegemônica dentro do bloco no poder dirigido pelo lulismo: “Os governos petistas não arbitram; na verdade eles priorizam os interesses dessa fração burguesa” (Boito, 2013, p.175). Aí se encontra o âmago da divergência.

Está em jogo saber qual a *contradição principal*: engajamento na produção *versus* ganhos rentistas ou capital nacional *versus* capital internacional. Boito reconhece que “o setor industrial tem conflito com o capital bancário nacional” (Boito, 2013, p. 179), do mesmo modo que eu admito que interesses opõem empresas de capital nacional às de capital internacional. Talvez os dois admitamos que, para iluminar a totalidade, *o conjunto de tensões interburguesas precisa ser levado em conta*.

O programa estabelecido no *Brasil do diálogo, da produção e do emprego,* representativo da coalizão produtivista,coincide, a meu ver, com aquele que Boito atribui à burguesia interna. As medidas tomadas no ensaio desenvolvimentista correspondem tanto aos interesses da burguesia produtiva quanto aos da burguesia interna. Em consequência, aplicar-se-ia à burguesia interna a pergunta feita para a industrial: por que não se mobilizou em defesa do ensaio desenvolvimentista quando este foi cercado pelos potentes exércitos do capital financeiro internacional? Por que, ao contrário, turbinou o retorno neoliberal, que em tese não lhe interessaria? Como diz Velasco e Cruz, “um dos aspectos mais desconcertantes no comportamento do empresariado brasileiro na crise presente é a sua passividade diante de atos e de políticas que parecem ir de forma flagrante contra os seus interesses” (Velasco e Cruz, 2017, p. 10).

Boito assinala, corretamente, que as disputas concorrenciais intercapitalistas não apagam os acordos burgueses gerais, por exemplo, o anseio pela desindexação de salários, a desregulamentação das relações de trabalho e a redução dos direitos sociais. Isto é, apesar das desavenças, em certos momentos forma-se uma frente em torno de interesses comuns. Há ainda a considerar que, na realidade contemporânea, as frações do capital podem estar mais misturadas do que antes. A imbricação de empresas produtivas com investimentos rentistas e a associação de capitais nacionais com o capital internacional diluem fronteiras antes melhor estabelecidas. A sugestão de Leda Paulani é pensar os interesses capitalistas como um “contínuo fracionado”, em que, apesar de ligados, percebem-se tensões permanentes. A formulação de Paulani tenta fixar que os interesses estão conectados, mas ao mesmo tempo reconhecer os conflitos internos que os dividem. A noção permite estudar as diferentes frações no primeiro mandato de Dilma, sem negar os pontos de contato entre elas nem as suas diferenças.

Dentre a profusão de possibilidades a serem consideradas para explicar a atitude dos empresários no período 2011-2014, vamos destacar quatro:

1. **Imbricação entre produção e rentismo**. Certas características estruturais da burguesia industrial brasileira tornaram frágil a coalizão produtivista. De um lado, a financeirização do capitalismo levou à mistura entre capital da indústria e das finanças. Diversas rubricas produtivas caíram sob o controle de bancos e fundos de investimento. De outro, de acordo com o economista Guilherme Mello, “após décadas de taxas de juros irreais, o conjunto do empresariado brasileiro, seja ele produtivo ou financeiro, imiscui-se em atividades puramente rentistas, se valendo da certeza de ganhos elevados em investimentos seguros e de elevada liquidez” (Mello, 2013).

Dilma faz, em retrospectiva, avaliação semelhante: “Todas as empresas brasileiras têm uma variante bancária chamada tesouraria, nas qual a parte financeira é, progressivamente, mais significativa que a parte produtiva” (Piccin e Pomar, 2017, p. 8). Exemplo flagrante dessa imbricação seriam as dificuldades atravessadas por companhias nacionais do setor produtivo durante o estrangulamento financeiro de 2008. Fortemente comprometidas com operações especulativas, viram-se em apuros quando os mercados entraram em convulsão.

A dupla condição de industriais e rentistas restringiria o *grau de empenho* na plataforma produtivista. Como capitão de indústria, o empresário deseja crédito barato, portanto, redução dos juros. Todavia, como proprietário de conglomerado que é também financeiro, aspira a juros altos, que remunerem o dinheiro aplicado. O caráter produtivo da atividade que esse empresário exerce implica impulso para a aliança com os trabalhadores, mas o vínculo com o componente financeiro dos lucros faz com que este impulso seja passível de fácil reversão quando o ambiente geral se altera. O resultado seria um baixo compromisso com a redução do ganho financeiro, indispondo-o para o inevitável conflito com o setor rentista. Outra vez, Dilma: “(...) *Esse processo é tão duro que eles não se interessam, não”* (Piccin e Pomar, 2017, p. 9)*.* Dito de outra maneira: à medida que o confronto esquenta os industriais recuam.

1. **Fator ideológico**. Para Bresser-Pereira, os empresários em geral, mesmo os produtivos, são sensíveis aos *argumentos* propalados pelo pensamento rentista (Bresser-Pereira, 2013B). Conforme indicado acima, a coalizão rentista mobilizou extenso aparato de formulação e divulgação de críticas ao ensaio desenvolvimentista. “Diante do fracasso da política industrial e do baixo crescimento causado pela sobreapreciação cambial de longo prazo existente no Brasil, a burguesia rentista e seus economistas liberais buscaram cooptar para a sua causa os empresários, embora seus interesses sejam conflitantes”, registrou Bresser-Pereira (Bresser-Pereira, 2013B). Sob o guarda-chuva do *antiintervencionismo,* juntaram-se acusações à administração Dilma de incompetência, arbítrio, autoritarismo e leniência com a corrupção.

É necessário considerar, também, que a piora das condições objetivas potencializa o efeito ideológico. O baixo crescimento do PIB em 2012, certa pressão inflacionária e a redução da margem de lucro forneceram combustível para argumentos antidesenvolvimentistas. Se as camadas populares talvez tenham ficado menos sensíveis ao bombardeio midiático em torno do baixo crescimento e do aumento de preços – uma vez que emprego e renda estavam preservados --, é razoável imaginar que a classe média tradicional, e talvez os industriais, que lhe são próximos, tenham sido influenciados pelos meios de comunicação.

No caso específico dos empresários industriais, o elemento de maior importância objetiva pode ter sido a oscilação no lucro. Segundo a CNI, houve queda generalizada da margem de ganho em 2012, com alguma recuperação em 2013 e nova queda em 2014 (Alegretti, 2013). De acordo com Bresser, a partir de 2012, com “a depreciação do real muito aquém do que era necessário para a indústria voltar a investir”, cresceu “a importação de bens manufaturados”. Consequentemente, “ocorreu uma queda radical na taxa de lucro das empresas industriais, que se tornou muito inferior à taxa média de juros Selic” (Bresser-Pereira, 2014, p. 369). Desgostosos com a situação objetiva, os industriais teriam se tornado ainda mais propensos a seguir a cantilena neoliberal.

1. **Luta de classes**. O avanço da intervenção estatal provocou expansão dos postos de trabalho formais. As taxas de desocupação no período Dilma foram baixas, ao redor de 4,5% entre 2011 a 2014. Em situações assim, conforme lembrou o economista Fernando Rugitsky a partir de raciocínio que Michael Kalecki (1899-1970) publicou em 1943, os empresários tendem a se afastar do governo (Rugistsky, 2015). Kalecki afirma que o pleno emprego mantido pelo governo tira dos empresários um instrumento decisivo para mandar na política econômica, a saber, justamente a ameaça do desemprego. Num contexto liberal, se os empresários “perdem a confiança” na política econômica, param de investir e o emprego cai. Então, o governo é obrigado a mudar a política. Mas se o pleno emprego é sustentado por verbas públicas, então esse poder de pressão cessa. Para revogar o arcabouço estatal que sustenta o pleno emprego, a burguesia usaria a greve de investimentos. As inversões, Brasil, estagnaram de 2011 a 2013, vindo a cair em 2014 (Rugitsky, 2015).[[11]](#footnote-12)

Deve-se lembrar que o pleno emprego deu musculatura aos sindicatos, o que resultou na contínua elevação do número de greves, que já vinha subindo desde 2008. Elas atingiram quase 87 mil horas paradas em 2012, o maior índice desde 1997 (Dieese, 2013A). Depois, continuaram a crescer, batendo em 111 mil horas paradas em 2014 (Dieese, 2013B). Houve 873 greves em 2012 com um salto para 2.050 em 2013. O sociólogo Ruy Braga observa que o pico anterior do total anual havia ocorrido em 1989, com 1.962 greves. A expressiva quantidade de paralisações no primeiro mandato de Dilma, conforme tem assinalado Braga, seria motivo suficiente para afastar o capital do trabalho, desfazendo a coalizão produtivista.

Na mesma direção, cumpre assinalar que o salário médio real teve aumento de 13% entre 2011 e 2013 (Villas Bôas, 2016). Tendo em vista a pressão de custos, decorrente da inflação e da desvalorização cambial, somada ao desaquecimento da economia, segmentos empresariais começaram a se queixar da elevada parcela do faturamento destinado a remunerar o trabalho. O encarecimento da mão de obra, que não teria podido ser repassada aos preços devido ao desaquecimento econômico, explicaria, ao menos em parte, a redução da lucratividade. Entende-se, nesse contexto, que a perspectiva neoliberal de diminuir salários e direitos tenha se tornado atraente. Reunidos os três fatores – perda de controle sobre a política econômica com o pleno emprego, incremento do número de greves e ascensão dos rendimentos do trabalho – faz sentido pensar que a oposição dos industriais ao ensaio desenvolvimentista tenha motivos diretamente ligados à luta de classes interna.

1. **Dimensão externa**. As relações internacionais se transformaram a partir da crise de 2008. De acordo com o ex-presidente Fernando Henrique Cardoso, o resultado das mudanças foi um mundo dominado pela “coexistência competitiva” de EUA e China. Daí a opção liderada pelos norte-americanos, na qual “Canadá, México, Argentina e Brasil podem ter um lugar ao sol” (Cardoso, 2013). Mas para isso, o país precisaria optar claramente pelos Estados Unidos e descartar a China (Cardoso, 2014). Velasco e Cruz assinala que, na segunda década do século XXI, liberados do fardo da guerra do Iraque, os Estados Unidos passaram a assistir com “inquietação indisfarçada” o avanço da China e da Rússia na América Latina, redesenhando mega-acordos comerciais para enfrentar a situação (Velasco e Cruz, 2017, p. 16).

A análise de Cardoso estava em linha com o que vinha se discutindo na TTIP, sigla em inglês para Transatlantic Trade and Investment Partnership (algo como Parceria Transatlântica sobre Comércio e Investimento) (Halimi, 2014; Jennar e Lambert, 2014). A TTIP era um “acordo de livre-comércio negociado desde julho de 2013 pelos Estados Unidos e pela União Europeia, visando criar o maior mercado do mundo, com mais de 800 milhões de consumidores” (Jennar e Lambert, 2014). Seria a saída ocidental diante da irresistível ascensão do par China- Índia.[[12]](#footnote-13) Um ponto nevrálgico é que o TTIP “prevê submeter as legislações em vigor dos dois lados do Atlântico à regras do livre-comércio, que correspondem na maioria das vezes às preferências das grandes empresas europeias e norte-americanas” (Jennar e Lambert, 2014). Pode-se imaginar a que camadas sociais tais “inovações” beneficiariam e a quais prejudicariam. De acordo com Wolf Jäcklein, da Confédération Général du Travail (CGT) francesa, uma das ameaças do TTIP seria o “não respeito dos direitos fundamentais do trabalho” (Jäcklein, 2014).

Ao que parece, a iniciativa do TTIP encontrou boa repercussão nos meios industriais brasileiros. Pedro Passos, ex-presidente do Instituto de Estudos para o Desenvolvimento Industrial (Iedi), que vinha se batendo pela reinclusão do Brasil nas cadeias produtivas globais, argumentava que “o isolamento internacional do Brasil poderá se aprofundar caso o país não se integre à tendência de mega-acordos, desencadeada em 2011 com o lançamento da TPP (Trans-Pacific Partnership), que envolve Estados Unidos e outros 11 países de três continentes, e com a TTIP (Transatlantic Trade and Investment Partnership), reunindo EUA e União Europeia” (Passos, 2014). Apesar da vitória de Donald Trump nos EUA, no final de 2016, ter arrefecido o ímpeto norte-americano pelos tratados de livre-comércio, no Brasil a agenda liberalizante, como se viu com a reforma trabalhista aprovada em julho de 2017, seguiu seu curso.

De acordo com a visão ocidentalista, o Mercosul deixaria o Brasil no isolamento, decorrente do seu não alinhamento com o bloco norte-americano. Não por acaso, dois ministros de Dilma 2, quando o ensaio desenvolvimentista havia terminado, emitiram em 2015 declarações *contra o Mercosul* e a favor de reaproximação com os Estados Unidos. Roberto Mangabeira Unger, da secretaria de Assuntos Estratégicos, afirmou que “o Mercosul é um corpo sem espírito” e que com os EUA “podemos fazer acordos sob vários aspectos” (Oliveira, 2015). Armando Monteiro, ministro do Desenvolvimento (e ex-presidente da CNI), disse que os EUA “representam a maior oportunidade para o incremento das exportações brasileiras” e defendeu não ficar amarrado só ao Mercosul (247, 2015). É possível, também, que a reorganização das relações internacionais, aqui descrita, tenha coincidido com a ofensiva chinesa sobre o mercado brasileiro de produtos manufaturados, provocando reação defensiva antichinesa dos setores atingidos. Com efeito, há relatos segundos os quais a ameaça chinesa mobilizou segmentos industriais na primeira metade do governo Dilma 1.[[13]](#footnote-14)

Vale recordar que em 2003, setores da indústria brasileira haviam apoiado a orientação lulista de bloquear a Alca e investir no relacionamento Sul-Sul, criando vínculo privilegiado com o Mercosul e a China. No final de 2013, entretanto, o presidente da Confederação Nacional da Indústria (CNI), Robson Andrade, falando a empresários norte-americanos em Denver (Colorado, EUA), afirmou abertamente que o Brasil deveria fechar acordo de livre comércio com os EUA, deixando o Mercosul em segundo plano (Mello, 2013). O que teria acontecido? Segundo esclarece o presidente da Associação Brasileira da Indústria Elétrica e Eletrônica (Abinee), Humberto Barbato, “mudamos o posicionamento. Há dez anos éramos refratários. (...) Agora estamos isolados, o Brasil está fora das cadeias de valor, *daqui a pouco estaremos parecidos com países da antiga Cortina de Ferro*” [Grifo meu: AS] (Mello, 2014).

Numa visão diametralmente oposta, mas que também privilegia a variável externa, Sampaio Jr. entende que Dilma subestimou o poder do constrangimento internacional. Para compensar a retração das exportações com a ampliação do mercado interno, como fez a China depois de 2008, o Brasil precisaria “romper com os parâmetros da ordem global”, de acordo com o economista. Seria necessário limitar o movimento dos capitais, obrigando-os a investimentos de interesse nacional. Na ausência desse tipo de controle, os investidores buscariam plataformas de ganho na “especulação urbana, fundiária e mercantil, fomentando a concentração de capital e pressionando o Estado por novas rodadas de privatização da infraestrutura e dos serviços públicos” (Sampaio Jr, 2013).

**Conclusão**

Se observarmos as quatro causas expostas acima, veremos que são complementares. O fato de a camada industrial ter ao mesmo tempo um lado rentista, a torna mais sensível à ideologia neoliberal, apesar desta orientação objetivamente prejudicar as atividades produtivas. O mesmo se aplica ao aguçamento da luta de classes: torna mais sedutores aos industriais os argumentos do neoliberalismo. A pluralidade de camadas empresariais prejudicadas – externas e internas, rentistas e produtivas – no período do ensaio desenvolvimentista explica a reação unida contra ele. As mudanças na conjuntura internacional podem ter aguçado e consolidado a frente única antidesenvolvimentista. O fato é a que as onças cutucadas, sendo muitas e atiçadas por farto material de imprensa, interna e externa, se juntaram e engoliram a nova matriz.

Em decorrência, a cronologia do período 2011-2014 revela a ocorrência de uma guerra oculta, à qual classe trabalhadora permaneceu alheia, pois a própria presidente talvez não tenha entendido a natureza da campanha à qual estava submetida. É plausível imaginar que isso tenha ocorrido por Dilma haver sido vítima de ilusão de ótica semelhante à que engolfou o nacionalismo dos anos 1950/1960. Ao atender os reclamos da burguesia industrial, imaginou que teria o respaldo dos industriais no momento em que os grupos contrariados reagissem. Diante de situação semelhante, em 1964, Cardoso, à época jovem professor e pesquisador da Universidade de São Paulo, escreveu que “*para afirmar-se como classe politicamente dominante e para expandir economicamente, a burguesia industrial é forçada a apoiar reformas e medidas que contrariam os grupos de dominação tradicional”.* Porém, tal movimento coloca (ou parece colocar) em risco a sua hegemonia futura*,* dada a possibilidade de ascensão das camadas populares,ocasionando um recuo “*no presente para não perder tudo no futuro”* (Cardoso, 1964, p. 186)*.*

Os termos, é claro, não podem ser retomados *ipsis literis*. Em 1963-4, a burguesia brasileira sentia-se ameaçada pela possibilidade de uma revolução socialista, temor inexistente cinquenta anos depois. No entanto, o medo de estar diante de projeto com apoio popular que queriaampliar o raio de ação do Estado, fixar preços, regular e controlar a atividade privada e, numa projeção longínqua, estatizar setores estratégicos, pode ter sido suficiente para unificá-la no combate ao ensaio desenvolvimentista, tal como se dera meio século antes.

O caráter errático da atuação de Dilma depois de junho de 2013 abriu uma avenida para o antilulismo que a derrubou por meio do impeachment. Engrenagens que aguardavam a oportunidade desde 2003 puseram‑se a funcionar. Uma ambiciosa coalizão de poder, capitaneada pelo PMDB e o PSDB foi sendo costurada desde pelo menos agosto de 2015. Ressentido pela quarta derrota seguida em eleições presidenciais, o PSDB forneceu elementos para a construção do golpe parlamentar. Embora o protagonismo final tenha sido do PMDB, que organizaria a votação na Câmara em 17 de abril e assumiria a Presidência em 12 de maio de 2016, a formulação jurídica, o programa econômico, a ponte com o empresariado e a legitimação perante a classe média passaram pelo PSDB — para não falar da centena de votos que o tucanato galvanizava no Legislativo. A mobilização de classe média impulsionada pela Lava Jato, via meios de comunicação, também ajudou, recobrindo o impeachment de Dilma Rousseff de apoio social (Singer, 2018, p. 31).

Assim, ainda que em ponto pequeno, o ensaio desenvolvimentista de Dilma pode ter seguido as pegadas de 1964. Na partida, a burguesia industrial pede uma ofensiva do Estado pelo crescimento com reindustrialização. No segundo ato da tragédia, pressionados pela queda de lucros, aumento das greves e reorientação hegemônica internacional, os industriais “descobrem” que, dado o passo inicial, estão às voltas com um poder sobre o qual temem perder o controle e que favorece em excesso os adversários de classe (trabalhadores), ocasionalmente aliados. No terceiro episódio, a burguesia industrial volta-se *“contra seus próprios interesses”* para evitar o mal maior: uma política nacional soberana, apoiada nas camadas populares unificadas*.* Os industriais, então, mudam de lado, juntando-se ao bloco conservador decidido a interromper a perigosa experiência.

**References:**

247. “Armando ao 247: ‘EUA são grande oportunidade’” (14/1/2015). Em [http://www.brasil247.com/pt/247/economia/166612/Armando-ao-247-%27EUA-s%C3%A3o-grande-oportunidade%27.htm](http://www.brasil247.com/pt/247/economia/166612/Armando-ao-247-'EUA-são-grande-oportunidade'.htm), consultado em 6/6/2015.

Alegretti, Laís. “Custo pressionou indústria em 2012 e reduziu margem de lucro” (14/3/2013). Em <http://economia.estadao.com.br/noticias/geral,custo-pressionou-industria-em-2012-e-reduziu-margem-de-lucro,147198e>, consultado em 29/5/2015. Sobre 2013 e 2014 ver <http://www.portaldaindustria.com.br/cni/imprensa/2014/03/1,34219/custos-sobem-menos-e-industria-recupera-em-2013-parte-da-reducao-da-margem-de-lucro.html> e <http://www.portaldaindustria.com.br/cni/imprensa/2015/04/1,60059/custos-da-industria-em-2014-foram-puxados-por-gastos-com-a-producao-e-capital-de-giro.html>, consultados em 22/8/2015.

Barrocal, André. “Arno não é mais uma Brastemp”. *Carta Capital*, 759, 31/7/2013, p. 37

Boito Jr., Armando. “Governo Lula: a nova burguesia nacional no poder”. In A. Boito Jr. e A. Galvão (Orgs.). *Política e classes sociais no Brasil dos anos 2000.* São Paulo, Alameda, 2012A.

_______________. “As bases políticas do neodesenvolvimentismo”. *Fórum Econômico da FGV*, 2012B.

_______________. “O lulismo é um tipo de bonapartismo? Uma crítica às teses de André Singer”. *Crítica Marxista*, 37, primeiro semestre de 2013.

Bielschowsky, Ricardo, *Pensamento econômico brasileiro: O ciclo ideológico do desenvolvimentismo*. Rio de Janeiro, Contraponto, 1995.

Branco, Mariana. “Presidente da CNI pede política econômica rumo à estabilidade” (5/11/2014). Em <http://agenciabrasil.ebc.com.br/economia/noticia/2014-11/presidente-da-cni-pede-politica-economica-rumo-estabilidade>, consultado: 21/6/2015.

Bresser-Pereira Luiz Carlos. “O governo Dilma frente ao ‘tripé macroeconômico’ e à direita liberal e dependente”. *Novos Estudos*, 95, março de 2013A, p. 10.

________________________. “Governo, empresários e rentistas”. *Folha de S. Paulo*, 2/12/2013B, p.

A14.

________________________. *A construção política do Brasil.* São Paulo, editora 34, 2014.

Cardoso, Fernando Henrique. *Empresário industrial e desenvolvimento econômico no Brasil*. São Paulo, Difel, 1964, p. 186.

_______________________. “Sem disfarce nem miopia”. *O Estado de S. Paulo*, 3/3/2013, p. A2.

_______________________. “Mudar o rumo”. *O Globo*, 5/2/2014, p. 13.

Carneiro, Ricardo. “Navegando a contravento” in R. Carneiro, P. Baltar, e F. Sarti, F (orgs) *Para além da política econômica: crescimento, desaceleração e crise no experimento desenvolvimentista*. São Paulo, Unesp, 2018.

CUT Nacional. “11 de julho: Manifestação nacional” (8/7/2013). Em <http://cut.org.br/noticias/11-de-julho-manifestacao-nacional-1845/>, consultado em 9/8/2015.

D’Amorim, Sheila e Sciarretta, Toni. “Bancos recuam e preparam juro menor”. *Folha de S. Paulo*, 18/4/2012, p. B1.

DIEESE. “Balanço das greves em 2012”. *Estudos e pesquisas*, 66, maio de 2013A. Em <http://www.dieese.org.br/balancodasgreves/2012/estPesq66balancogreves2012.pdf>, consultado em 29/7/2015.

DIEESE. “Balanço das greves em 2013”. *Estudos e pesquisas*, 79, dezembro de 2013B.

Diretório Nacional do PT. *Concepção e diretrizes do programa de governo do PT para o Brasil*, 2002.

Fiesp. “Paraguai oferece vantagens competitivas para o setor têxtil, destaca diretor do Departamento de Relações Internacionais e Comércio Exterior da Fiesp” (3/4/2013). Em <http://www.fiesp.com.br/noticias/paraguai-oferece-vantagens-competitivas-para-setor-textil-destaca-diretor-do-departamento-de-relacoes-internacionais-e-comercio-exterior-da-fiesp/>, consultado em 30/7/2015 (grifos nossos).

Guimarães, Ligia. “Para professor da Unicamp, ajuste em meio à recessão é contraproducente”. *Valor*, 6/8/2015. Em <http://jornalggn.com.br/noticia/para-professor-da-unicamp-ajuste-em-meio-a-recessao-e-contraproducente>, consultado em 15/8/2015.

Halimi, Serge. “As potências redesenham o mundo”, *Le Monde Diplomatique Brasil*, 83, junho de 2014, pp. 10-1.

Henrique, Artur. “Os lucros, a ganância, a usura e a cegueira” (1/5/2013). Em <http://www.cartacapital.com.br/politica/os-lucros-a-ganancia-a-usura-e-a-cegueira-3894.html>, consultado em 29/7/2015.

Jäcklein, Wolf. “...e dez ameaças aos europeus”, *Le Monde Diplomatique Brasil*, 84, julho de 2014.

Jennar, Raoul Marc e Lambert, Renaud. “Descobrindo o tratado”, *Le Monde Diplomatique Brasil*, 84, julho de 2014.

Leitão, Miriam. “Alta desconfortável” (7/2/2013). Em <http://blogs.oglobo.globo.com/miriam-leitao/post/alta-desconfortavel-485606.html>, consultado em 28/2/2015.

Mantega, Guido. “O primeiro ano da nova matriz econômica”. *Valor*, 19/12/2012, p. F3.

Mello, Guilherme. “Percalços da transformação monetária e a nova contrarrevolução liberal conservadora”. *Mimeo*, Fundação Perseu Abramo, outubro/novembro de 2013.

Mello, Patrícia Campos. “Indústria brasileira propõe firmar acordo de livre-comércio com os EUA” (14/11/2013). Em <http://www1.folha.uol.com.br/mercado/2013/11/1371141-industria-brasileira-propoe-firmar-acordo-de-livre-comercio-com-eua.shtml>, consultado em 13/8/2015.

Mendes, Priscilla. “Para facilitar crédito, Dilma defende diminuição do ‘spread’ bancário” (3/4/2012). Em <http://g1.globo.com/economia/noticia/2012/04/para-facilitar-credito-dilma-defende-diminuicao-do-spread-bancario.html>, consultado em 11/7/2015.

Oliveira, Eliane. “Mercosul é ‘corpo sem espírito’ e foco deve ser EUA, diz Mangabeira Unger”, (9/5/2015). Em <http://oglobo.globo.com/economia/mercosul-corpo-sem-espirito-foco-deve-ser-eua-diz-mangabeira-unger-16105668>, consultado em 6/6/2015.

Passos, Pedro. “O Brasil não pode ser uma ilha”, *Folha de S. Paulo* (17/1/2014). Em <http://www1.folha.uol.com.br/colunas/pedropassos/2014/01/1398869-o-brasil-nao-pode-ser-uma-ilha.shtml>, consultado em 6/6/2015.

Piccin, Marcos e Pomar, Valter. “Entrevista exclusiva: Dilma Rousseff sem censura, ou quase”. Esquerda Petista, 12/6/2017, p. 9. Ver [http://www.pagina13.org.br/revista-esquerda-petista/entrevista-exclusiva-dilma-rousseff-sem-censura-ou-quase/#.WW4fi9QrJnI](http://www.pagina13.org.br/revista-esquerda-petista/entrevista-exclusiva-dilma-rousseff-sem-censura-ou-quase/" \l ".WW4fi9QrJnI), consultado em 18/7/2017.

Poulantzas, Nicos. *As classes sociais no capitalismo de hoje*. Rio de Janeiro, Zahar, 1975.

Rugitsky, Fernando. “Do ensaio desenvolvimentista à austeridade: uma leitura Kaleckiana”. *Carta Maior*, 8/5/2015. Em <http://cartamaior.com.br/?/Editoria/Economia/Do-Ensaio-Desenvolvimentista-a-austeridade-uma-leitura-Kaleckiana/7/33448>, consultado em 6/6/2015.

Safatle, Claudia. “Dilma agirá para abrandar a desconfiança de empresários”. *Valor*, 7/10/2013, p. 1.

Sampaio Jr., Plínio de Arruda. “2013: o gato subiu no telhado”. *Jornal dos economistas* (Conselho Regional de Economia do Rio de Janeiro), 282, janeiro de 2013. Em [http://www.corecon-rj.org.br/documents/11827/13953/Janeiro+-+2013+(n%C2%BA282)/1da4d5eb-89ab-4c6a-a2a9-45d11cd1baef?version=1.1](http://www.corecon-rj.org.br/documents/11827/13953/Janeiro+-+2013+(nº282)/1da4d5eb-89ab-4c6a-a2a9-45d11cd1baef?version=1.1), consultado em 7/8/2015.

Singer, André. *Os sentidos do lulismo: reforma gradual e pacto conservador*, São Paulo, Companhia das Letras, 2012.

*__________. O lulismo em crise: um quebra-cabeça do período Dilma (2011-2016)*. São Paulo, Companhia das Letras, 2018.

Singer, Paul. *Dominação e desigualdade*. Paz e Terra, São Paulo.

Skaf, Paulo. “Do que o Brasil precisa” (24/6/2013). Em <http://www.fiesp.com.br/noticias/no-diario-de-s-paulo-artigo-de-paulo-skaf-fala-sobre-as-manifestacoes-em-todo-o-pais/>, consultado em 30/7/2015.

_________, Artur Henrique e Paulo Pereira da Silva. “Um acordo pela indústria brasileira”. *Folha de S. Paulo*, 26/5/2011, p. A3.

Souza, Marcos de Moura e. “Dilma diz que PSDB quer ‘trazer de volta recessão e desemprego’” (30/5/2014). Em <http://www.valor.com.br/politica/3569748/dilma-diz-que-psdb-quer-trazer-de-volta-recessao-e-desemprego>, consultado em 29/8/2015.

Steinbruch, Benjamin. “País diferente”. *Folha de S. Paulo* (9/10/2012). Em <http://www1.folha.uol.com.br/colunas/benjaminsteinbruch/2012/10/1166305-pais-diferente.shtml>, consultado em 11/7/2015.

UOL. “Importante no PIB, investimento de empresas cai há 6 trimestres seguidos” (27/3/2015). Em <http://economia.uol.com.br/noticias/redacao/2015/03/27/importante-no-pib-investimento-de-empresas-cai-ha-6-trimestres-seguidos.htm>, consultado em 2/8/2015.

Velasco e Cruz, Sebastião. “Burguesia e empresariado no Brasil. Viagem a um passado distante e o caminho de volta”. Mimeo, 2017, p. 4.

Villas Bôas, Bruno. “Desemprego nas metrópoles sobe a 6,9% em junho, maior taxa desde 2010” (23/7/2015). Em <http://www1.folha.uol.com.br/mercado/2015/07/1659358-desemprego-nas-metropoles-sobe-a-69-em-junho-maior-taxa-desde-2010.shtml>, consultado em 27/2/2016. Cálculo nosso (AS) a partir do salário médio real em 6/1/2011 e 11/1/2014.

1. Este artigo é uma versão modificada de “Cutucando onças com varas curtas”, *Novos Estudos*, 102, Junho de 2015, “A (falta de) base política para o ensaio desenvolvimentista”. In A. Singer e I. Loureiro (Orgs.). *As contradições do lulismo: a que ponto chegamos?* São Paulo, Boitempo, 2016, e “Cutucando onças com bases curtas” In A. Singer. *O lulismo em crise: um quebra-cabeça do período Dilma (2011-2016)*. São Paulo, Companhia das Letras, 2018. Uma edição resumida em língua inglesa apareceu em *Critical Policy Studies*, 11:3, 2017, com o título de “The failure of the developmentalist experiment in three acts”. [↑](#footnote-ref-2)
2. Deve-se registrar que, para uma parte dos economistas, a restrição orçamentária foi excessiva nessa fase e determinou o curso ulterior da nova matriz. Guido Mantega, contudo, afirma que “foi muito importante a elevação do resultado primário de 2011 para dar respaldo à redução de juros” (Mantega, 2012). [↑](#footnote-ref-3)
3. “A recaída da crise internacional ocorrida a partir do segundo semestre de 2011 teve severo impacto sobre a atividade econômica. Nesse quadro, abriu-se a oportunidade de avançarmos definitivamente na queda dos juros, sem colocar em risco a inflação e ainda diminuindo os impactos da crise externa sobre o Brasil” (Mantega, 2012). [↑](#footnote-ref-4)
4. Por razões de espaço, faz-se aqui uma síntese de centenas de iniciativas tomadas pelo governo no período. Para maiores detalhes, ver Singer (2018). [↑](#footnote-ref-5)
5. Estas linhas, com modificações, seguem Singer (2012, p. 76). [↑](#footnote-ref-6)
6. Mais tarde, em função da piora das condições políticas e econômicas, o dólar voltou a subir, chegando a R$3,40 no final de julho de 2015, mas o contexto já era outro. [↑](#footnote-ref-7)
7. Para a ideia de reformismo fraco ver Singer (2012, Cap. 4). [↑](#footnote-ref-8)
8. Sobre as diferentes fases dos governos Lula, ver Singer (2012, pp. 148-155). [↑](#footnote-ref-9)
9. Bresser-Pereira (2013B) fala em uma coalizão “financeiro-rentista”, “formada pela alta e média burguesia rentista e pelos financistas”, cujo objetivo seria sempre manter um alto nível de taxa de juros. [↑](#footnote-ref-10)
10. Sobre junho, ver Singer (2018, Cap. 3). [↑](#footnote-ref-11)
11. O desemprego caiu de 5,3% em 2010 para 4,7% em 2011, para 4,6% em 2012 e para 4,3% em 2013 e 2014 (medida pelo IBGE em dezembro de cada ano). Para uma análise completa da questão do investimento, deve-se lembrar que a Petrobras, fonte fundamental de investimento no país, aplicou menos em 2014. [↑](#footnote-ref-12)
12. Convém notar, também, a aproximação entre Rússia e China no contexto do reordenamento global. [↑](#footnote-ref-13)
13. O cientista político Danilo Martuscelli tem alertado para esse fator. [↑](#footnote-ref-14)
